# Supplementary material
Source: PubMed Central journal article supplement (PMC6646576)
Supplement: ao8b01913_si_001.pdf [file ao8b01913_si_001.pdf]

Supporting Information for

**Resveratrol Sustains Insulin-degrading Enzyme Activity towards A $\beta$ 42**

Claire A. Krasinski, Valerie A. Ivancic, Qiuchen Zheng, Donald E. Spratt, and Noel D. Lazo\*

Carlson School of Chemistry and Biochemistry, Clark University, 950 Main Street, Worcester, Massachusetts  
01610, United States

Correspondence: [nlazo@clarku.edu](mailto:nlazo@clarku.edu)

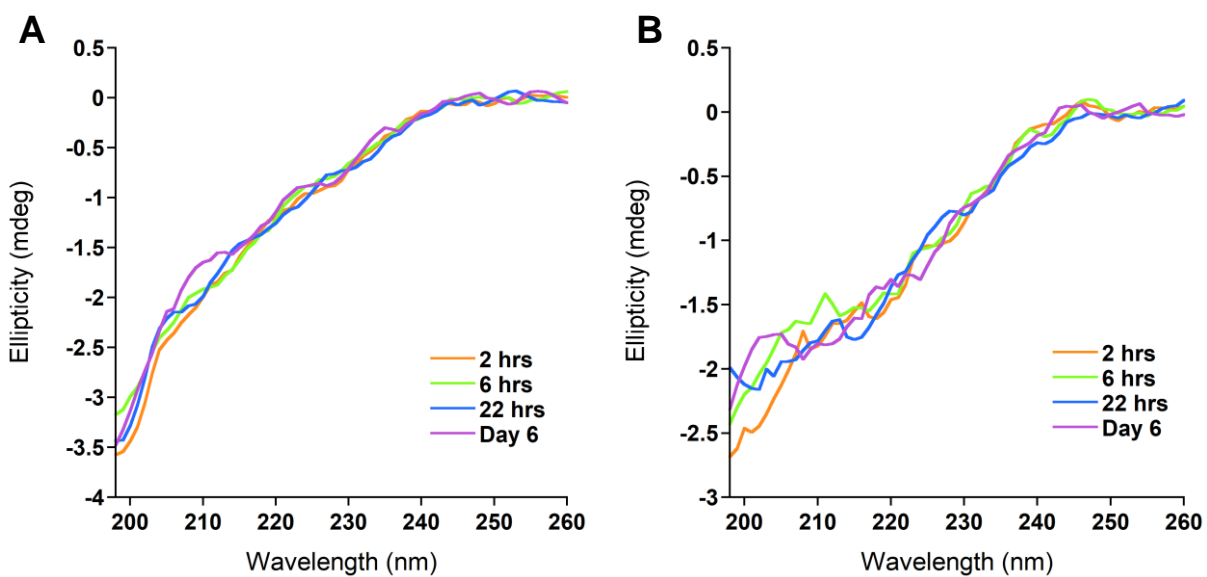

**Figure S1.** A $\beta$ 42 in the absence or presence of resveratrol at 4 °C is unstructured. Circular dichroic spectra of A $\beta$ 42 (25  $\mu$ M in 10 mM phosphate buffer, pH 7.4) in the absence (A) and presence (B) of resveratrol (40  $\mu$ M) recorded after 2 hours, 6 hours, 22 hours and 6 days of preparation show minima below 200 nm, indicating the presence of random coil.

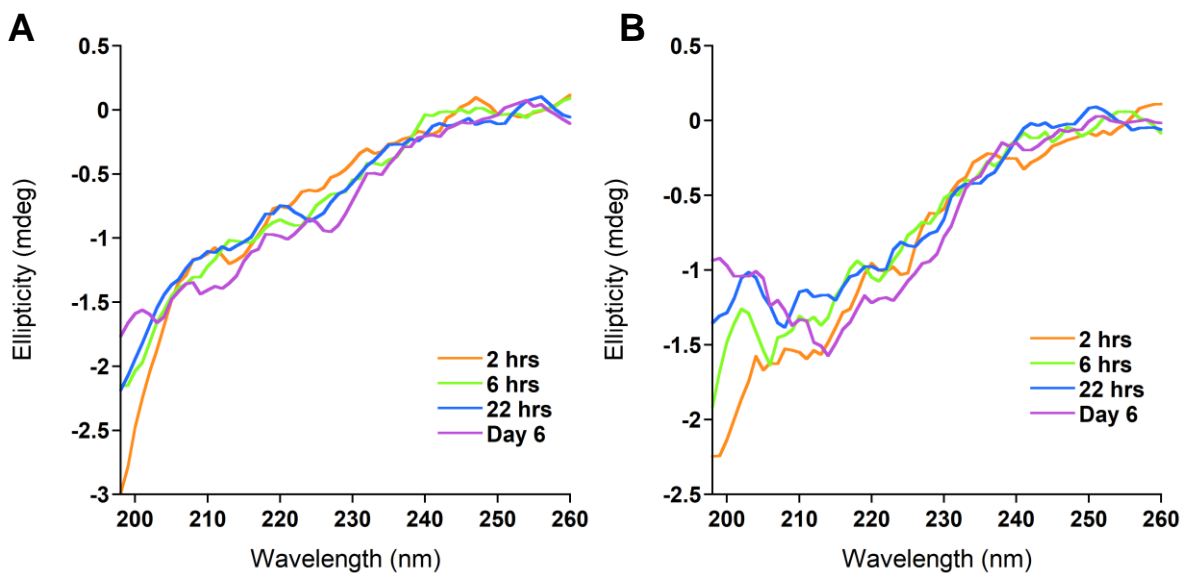

**Figure S2.** Digests of A $\beta$ 42 in the absence or presence of resveratrol at 4 °C contain unstructured peptides. Circular dichroic spectra of digests of A $\beta$ 42 (25  $\mu$ M A $\beta$ 42 and 0.25  $\mu$ M IDE (substrate-to-enzyme molar ratio of 100:1) in 10 mM phosphate buffer, pH 7.4) in the absence (A) and presence (B) of resveratrol (40  $\mu$ M) recorded after 2 hours, 6 hours, 22 hours and 6 days of preparation show minima below 200 nm, indicating the presence of random coil.

**Table S1.** Secondary fragments resulting from IDE-dependent degradation of A $\beta$ <sub>42</sub> (25  $\mu$ M in 10 mM phosphate buffer, pH 7.4) for 2 hours at 4 °C and substrate-to-enzyme molar ratio of 100:1.

| Fragments | Observed m/z | Charge | Observed Mass | Theoretical Mass | $\delta$ (Da) <sup>1</sup> |
|-----------|--------------|--------|---------------|------------------|----------------------------|
| D1-H13    | 391.17       | 4      | 1560.68       | 1561.59          | -0.91                      |
|           | 521.23       | 3      | 1560.69       |                  | -0.90                      |
|           | 781.34       | 2      | 1560.68       |                  | -0.91                      |
| D1-H14    | 425.44       | 4      | 1697.76       | 1698.73          | -0.97                      |
|           | 566.91       | 3      | 1697.73       |                  | -1.00                      |
| D1-V18    | 542.76       | 4      | 2167.04       | 2167.33          | -0.29                      |
| S26-A42   | 799.97       | 2      | 1597.94       | 1598.96          | -1.02                      |
| N27-A42   | 756.45       | 2      | 1510.90       | 1511.89          | -0.99                      |
| K28-A42   | 699.43       | 2      | 1396.86       | 1397.78          | -0.92                      |
| L34-A42   | 429.76       | 2      | 857.52        | 858.11           | -0.59                      |
| H14-S26   | 492.92       | 3      | 1475.76       | 1476.65          | -0.89                      |
|           | 738.88       | 2      | 1475.76       |                  | -0.89                      |
| H14-K28   | 430.48       | 4      | 1717.92       | 1718.93          | -1.01                      |
|           | 573.63       | 3      | 1717.89       |                  | -1.04                      |
|           | 859.95       | 2      | 1717.90       |                  | -1.03                      |
| Q15-K28   | 527.95       | 3      | 1580.85       | 1581.79          | -0.94                      |
|           | 791.42       | 2      | 1580.84       |                  | -0.95                      |
| L17-K28   | 663.34       | 2      | 1324.68       | 1325.48          | -0.80                      |
| Q15-S26   | 670.35       | 2      | 1338.70       | 1339.51          | -0.81                      |
| F20-G33   | 689.35       | 2      | 1376.70       | 1377.52          | -0.82                      |
| L17-G25   | 497.75       | 2      | 993.50        | 996.13           | -2.63                      |
| A30-M35ox | 317.70       | 2      | 633.40        | 632.82           | 0.58                       |
| Q15-F20   | 391.23       | 2      | 780.46        | 780.97           | -0.51                      |
| H14-F20   | 459.76       | 2      | 917.52        | 918.11           | -0.59                      |
| F20-M35   | 811.42       | 2      | 1620.84       | 1621.87          | -1.03                      |
| K16-K28   | 364.45       | 4      | 1453.80       | 1453.66          | 0.14                       |
|           | 485.60       | 3      | 1453.80       |                  | 0.14                       |

<sup>1</sup>Observed Mass - Theoretical Mass

**Table S2.** Secondary fragments resulting from IDE-dependent degradation of A $\beta$ <sub>42</sub> (25  $\mu$ M in 10 mM phosphate buffer, pH 7.4) for 6 hours at 4 °C and substrate-to-enzyme molar ratio of 100:1.

| Fragments | Observed m/z | Charge | Observed Mass | Theoretical Mass | $\delta$ (Da) <sup>1</sup> |
|-----------|--------------|--------|---------------|------------------|----------------------------|
| D1-H13    | 391.17       | 4      | 1560.68       |                  | -0.91                      |
|           | 521.23       | 3      | 1560.69       | 1561.59          | -0.90                      |
|           | 781.34       | 2      | 1560.68       |                  | -0.91                      |
| D1-H14    | 425.44       | 4      | 1697.76       |                  | -0.97                      |
|           | 566.91       | 3      | 1697.73       | 1698.73          | -1.00                      |
| D1-V18    | 542.76       | 4      | 2167.04       | 2167.33          | -0.29                      |
| S26-A42   | 799.97       | 2      | 1597.94       | 1598.96          | -1.02                      |
| N27-A42   | 756.45       | 2      | 1510.90       | 1511.89          | -0.99                      |
| K28-A42   | 699.43       | 2      | 1396.86       | 1397.78          | -0.92                      |
| L34-A42   | 429.76       | 2      | 857.52        | 858.11           | -0.59                      |
| H14-S26   | 492.92       | 3      | 1475.76       |                  | -0.89                      |
|           | 738.88       | 2      | 1475.76       | 1476.65          | -0.89                      |
| H14-K28   | 430.48       | 4      | 1717.92       |                  | -1.01                      |
|           | 573.64       | 3      | 1717.92       | 1718.93          | -1.01                      |
|           | 859.95       | 2      | 1717.90       |                  | -1.03                      |
| Q15-K28   | 527.95       | 3      | 1580.85       |                  | -0.94                      |
|           | 791.42       | 2      | 1580.84       | 1581.79          | -0.95                      |
| H14-F20   | 459.76       | 2      | 917.52        | 918.11           | -0.59                      |
| L17-K28   | 663.34       | 2      | 1324.68       | 1325.48          | -0.80                      |
| Q15-S26   | 670.35       | 2      | 1338.70       | 1339.51          | -0.81                      |
| F20-G33   | 689.85       | 2      | 1377.70       | 1377.52          | 0.18                       |
| A30-M350x | 317.70       | 2      | 633.40        | 632.82           | 0.58                       |
| Q15-F20   | 391.23       | 2      | 780.46        | 780.97           | -0.51                      |
| F19-K28   | 557.26       | 2      | 1112.52       | 1113.19          | -0.67                      |
| K16-K28   | 364.45       | 4      | 1453.80       |                  | 0.14                       |
|           | 485.60       | 3      | 1453.80       | 1453.66          | 0.14                       |
| D7-F19    | 520.26       | 3      | 1557.78       | 1558.71          | -0.93                      |
| Y10-F20   | 482.92       | 3      | 1445.76       | 1446.67          | -0.91                      |
| F20-M35   | 811.42       | 2      | 1620.84       | 1621.87          | -1.03                      |
| A21-G33   | 614.82       | 2      | 1229.64       | 1230.34          | -0.70                      |

<sup>1</sup>Observed Mass - Theoretical Mass

**Table S3.** Secondary fragments resulting from IDE-dependent degradation of A $\beta$ <sub>42</sub> (25  $\mu$ M in 10 mM phosphate buffer with 40  $\mu$ M resveratrol, pH 7.4) for 2 hours at 4 °C and substrate-to-enzyme molar ratio of 100:1.

| Fragments | Observed m/z | Charge | Observed Mass | Theoretical Mass | $\delta$ (Da) <sup>1</sup> |
|-----------|--------------|--------|---------------|------------------|----------------------------|
| D1-H13    | 391.17       | 4      | 1560.68       |                  | -0.91                      |
|           | 521.23       | 3      | 1560.69       | 1561.59          | -0.90                      |
|           | 781.34       | 2      | 1560.68       |                  | -0.91                      |
| D1-H14    | 425.44       | 4      | 1697.76       | 1698.73          | -0.97                      |
|           | 566.91       | 3      | 1697.73       |                  | -1.00                      |
| D1-V18    | 542.76       | 4      | 2167.04       | 2167.33          | -0.29                      |
| S26-A42   | 799.97       | 2      | 1597.94       | 1598.96          | -1.02                      |
| N27-A42   | 756.45       | 2      | 1510.90       | 1511.89          | -0.99                      |
| K28-A42   | 699.43       | 2      | 1396.86       | 1397.78          | -0.92                      |
| L34-A42   | 429.76       | 2      | 857.52        | 858.11           | -0.59                      |
| L34-A42ox | 437.76       | 2      | 873.52        | 874.51           | -0.99                      |
| D23-A42   | 623.31       | 3      | 1866.93       | 1870.24          | -3.31                      |
| H13-S26   | 405.19       | 4      | 1616.76       | 1613.79          | 2.97                       |
|           | 539.91       | 3      | 1616.73       |                  | 2.94                       |
| H14-S26   | 492.92       | 3      | 1475.76       | 1476.65          | -0.89                      |
|           | 738.88       | 2      | 1475.76       |                  | -0.89                      |
| H14-K28   | 430.48       | 4      | 1717.92       |                  | -1.01                      |
|           | 573.63       | 3      | 1717.89       | 1718.93          | -1.04                      |
|           | 859.95       | 2      | 1717.90       |                  | -1.03                      |
| H14-N27   | 398.18       | 4      | 1588.72       |                  | -2.04                      |
|           | 530.57       | 3      | 1588.71       | 1590.76          | -2.05                      |
|           | 795.35       | 2      | 1588.70       |                  | -2.06                      |
| Q15-K28   | 527.95       | 3      | 1580.85       | 1581.79          | -0.94                      |
|           | 791.42       | 2      | 1580.84       |                  | -0.95                      |
| L17-K28   | 663.34       | 2      | 1324.68       | 1325.48          | -0.80                      |
| Q15-S26   | 670.35       | 2      | 1338.70       | 1339.51          | -0.81                      |
| F20-G33   | 689.85       | 2      | 1377.70       | 1377.52          | 0.18                       |
| F20-V36   | 432.45       | 4      | 1725.80       | 1722.02          | 3.78                       |
|           | 576.26       | 3      | 1725.78       |                  | 3.76                       |
| L17-G25   | 497.75       | 2      | 993.50        | 996.13           | -2.63                      |
| A30-M35ox | 317.70       | 2      | 633.40        | 632.82           | 0.58                       |
| Q15-F20   | 391.23       | 2      | 780.46        | 780.97           | -0.51                      |
| A2-F19    | 549.77       | 4      | 2195.08       | 2199.41          | -4.33                      |
| S26-G38   | 608.31       | 2      | 1214.62       | 1216.46          | -1.84                      |
| K16-K28   | 485.26       | 3      | 1452.78       | 1453.66          | -0.88                      |
| H14-F20   | 459.76       | 2      | 917.52        | 918.11           | -0.59                      |
| F20-G37   | 889.46       | 2      | 1776.92       | 1778.05          | -1.13                      |
| F20-M35   | 811.42       | 2      | 1620.84       | 1621.87          | -1.03                      |
| Q15-N27   | 727.37       | 2      | 1452.74       | 1453.61          | -0.87                      |
| I32-G38ox | 331.72       | 2      | 661.44        | 661.81           | -0.37                      |
| R5-L17    | 537.29       | 3      | 1608.87       | 1606.75          | 2.12                       |
| F20-L34   | 745.43       | 2      | 1488.86       | 1490.78          | -1.92                      |
| F19-V39ox | 700.39       | 3      | 2098.17       | 2098.44          | -0.27                      |
|           | 1050.08      | 2      | 2098.16       |                  | -0.28                      |

<sup>1</sup>Observed Mass – Theoretical Mass

**Table S4.** Secondary fragments resulting from IDE-dependent degradation of A $\beta$ <sub>42</sub> (25  $\mu$ M in 10 mM phosphate buffer with 40  $\mu$ M resveratrol, pH 7.4) for 6 hours at 4 °C and substrate-to-enzyme molar ratio of 100:1.

| Fragments | Observed m/z | Charge | Observed Mass | Theoretical Mass | $\delta$ (Da) <sup>1</sup> |
|-----------|--------------|--------|---------------|------------------|----------------------------|
| D1-H13    | 391.17       | 4      | 1560.68       |                  | -0.91                      |
|           | 521.23       | 3      | 1560.69       | 1561.59          | -0.90                      |
|           | 781.34       | 2      | 1560.68       |                  | -0.91                      |
| D1-H14    | 425.44       | 4      | 1697.76       | 1698.73          | -0.97                      |
|           | 566.91       | 3      | 1697.73       |                  | -1.00                      |
| D1-V18    | 542.76       | 4      | 2167.04       | 2167.33          | -0.29                      |
| S26-A42   | 799.97       | 2      | 1597.94       | 1598.96          | -1.02                      |
| N27-A42   | 756.45       | 2      | 1510.90       | 1511.89          | -0.99                      |
| L34-A42   | 429.76       | 2      | 857.52        | 858.11           | -0.59                      |
| L34-A42ox | 437.76       | 2      | 873.52        | 874.51           | -0.99                      |
| K28-A42   | 699.43       | 2      | 1396.86       | 1397.78          | -0.92                      |
| H14-S26   | 492.92       | 3      | 1475.76       | 1476.65          | -0.89                      |
|           | 738.88       | 2      | 1475.76       |                  | -0.89                      |
| H14-K28   | 430.48       | 4      | 1717.92       |                  | -1.01                      |
|           | 573.63       | 3      | 1717.89       | 1718.93          | -1.04                      |
|           | 859.95       | 2      | 1717.90       |                  | -1.03                      |
| H14-N27   | 398.18       | 4      | 1588.72       |                  | -2.04                      |
|           | 530.57       | 3      | 1588.71       | 1590.76          | -2.05                      |
|           | 795.35       | 2      | 1588.70       |                  | -2.06                      |
| Q15-K28   | 527.95       | 3      | 1580.85       | 1581.79          | -0.94                      |
|           | 791.42       | 2      | 1580.84       |                  | -0.95                      |
| H13-S26   | 405.19       | 4      | 1616.76       | 1613.79          | -2.97                      |
|           | 539.91       | 3      | 1616.73       |                  | -2.94                      |
| H14-F20   | 459.76       | 2      | 917.52        | 918.11           | -0.59                      |
| L17-K28   | 663.34       | 2      | 1324.68       | 1325.48          | -0.80                      |
| Q15-S26   | 670.35       | 2      | 1338.70       | 1339.51          | -0.81                      |
| F20-G33   | 689.85       | 2      | 1377.70       | 1377.52          | 0.18                       |
| F20-V36   | 346.16       | 5      | 1725.80       |                  | 3.78                       |
|           | 432.45       | 4      | 1725.80       | 1722.02          | 3.78                       |
|           | 576.26       | 3      | 1725.78       |                  | 3.76                       |
| L17-G25   | 497.75       | 2      | 993.50        | 996.13           | -2.63                      |
| A21-G33   | 615.82       | 2      | 1229.64       | 1230.34          | -0.70                      |
| A30-M35ox | 317.70       | 2      | 633.40        | 632.82           | 0.58                       |
| A21-M35   | 737.88       | 2      | 1473.76       | 1474.69          | -0.93                      |
| E22-M35   | 703.37       | 2      | 1404.74       | 1403.61          | 1.13                       |
| S26-M35ox | 511.76       | 2      | 1021.52       | 1020.24          | 1.28                       |
| F20-L34   | 745.90       | 2      | 1489.80       | 1490.68          | -0.88                      |
| Q15-F20   | 391.23       | 2      | 780.46        | 780.97           | -0.51                      |
| S26-G38   | 608.31       | 2      | 1214.62       | 1216.46          | -1.84                      |
| Y10-F20   | 482.92       | 3      | 1445.76       | 1446.67          | -0.91                      |
| K16-K28   | 485.26       | 3      | 1452.78       | 1453.66          | -0.14                      |
| F19-K28   | 557.26       | 2      | 1112.52       | 1113.19          | -0.67                      |
| F4-L17    | 439.45       | 4      | 1753.80       | 1752.91          | -0.89                      |
| R5-L17    | 537.29       | 3      | 1608.87       | 1606.75          | 2.12                       |
| I32-G38ox | 331.72       | 2      | 661.44        | 661.81           | -0.37                      |
| F19-V39ox | 700.39       | 3      | 2098.17       | 2098.44          | -0.27                      |
|           | 1050.08      | 2      | 2098.16       |                  | -0.28                      |

<sup>1</sup>Observed Mass - Theoretical Mass
